# Supplementary material
Source: publisher figshare collection journal article supplement (https://frontiersin.figshare.com/ndownloader/files/31256797)
Supplement: Supplementary file [file 31256797]

**A**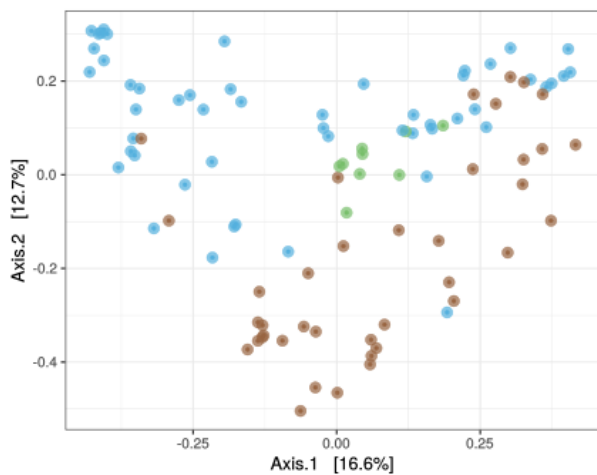**B**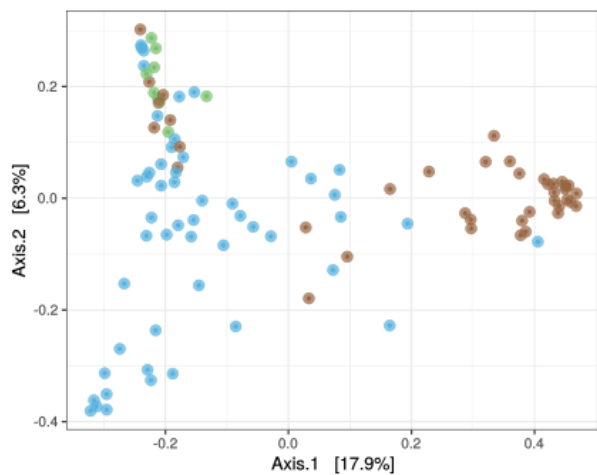

**Supplementary Figure S4: Differences in community composition.** Principal coordinates analyses (PCoA) of the microbial community composition based on Bray-Curtis dissimilarity matrices. Indicate differences in community composition between seawater at tide sites (TS-sw, *blue*), *Sargassum* at tide sites *Sargassum* (TS-sarg, *brown*), and *Sargassum* at inland storage sites (ISS-sarg, *green*). (A) Prokaryotic community; and (B) Eukaryotic community.
